# Supplementary material for: Minimal genetic differentiation of the malaria vector Nyssorhynchus darlingi associated with forest cover level in Amazonian Brazil
Source: PubMed Central journal article supplement (PMC6855485; doi:10.1371/journal.pone.0225005), 2019-11-14
Supplement: pone.0225005.s001.pdf [file pone.0225005.s001.pdf]

**S1 File: Supplementary Figures and Tables**

**Minimal genetic differentiation of the malaria vector *Nyssorhynchus darlingi* associated with forest cover level in Amazonian Brazil**

Catharine Prussing, Kevin J. Emerson, Sara A. Bickersmith, Maria Anice Mureb Sallum, and  
Jan E. Conn

**Fig A.** Selection of optimal number of clusters for STRUCTURE analysis using the Evanno method. (A) Posterior probability of the data ( $L(K)$ ) for  $K=1$  to 10, (B)  $L'(K)$  for  $K=1$  to 9, and (C)  $L''(K)$  and (D)  $\Delta K$  for  $K=2$  to 9.

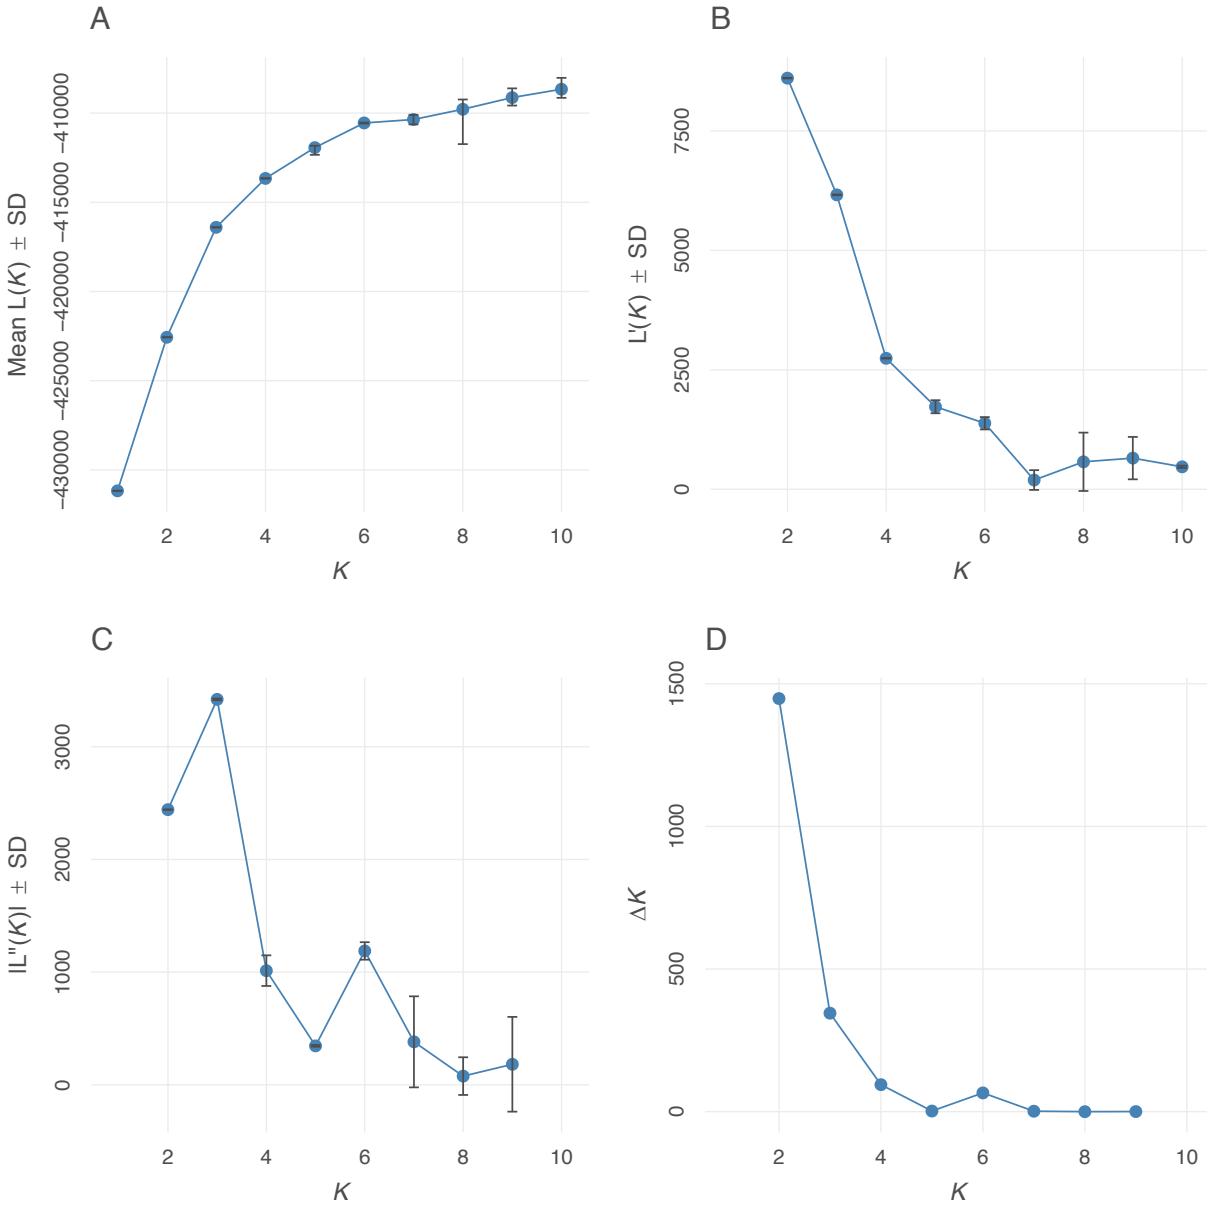

**Fig B.** Results of fastSTRUCTURE analysis of 5561 SNP dataset. (A) Includes *Ny. darlingi* collected from all four municipalities (CRU: Cruzeiro do Sul area, LAB: Lábrea, PRE: Presidente Figueiredo, SAO: São Gabriel da Cachoeira) and five forest cover levels (1-5), depicting  $K=2-6$  inferred clusters; (B) CRU only,  $K=1-5$ ; (C) LAB only,  $K=1-5$ ; (D) PRE only,  $K=1-5$ ; (E) SAO only,  $K=1-5$ .

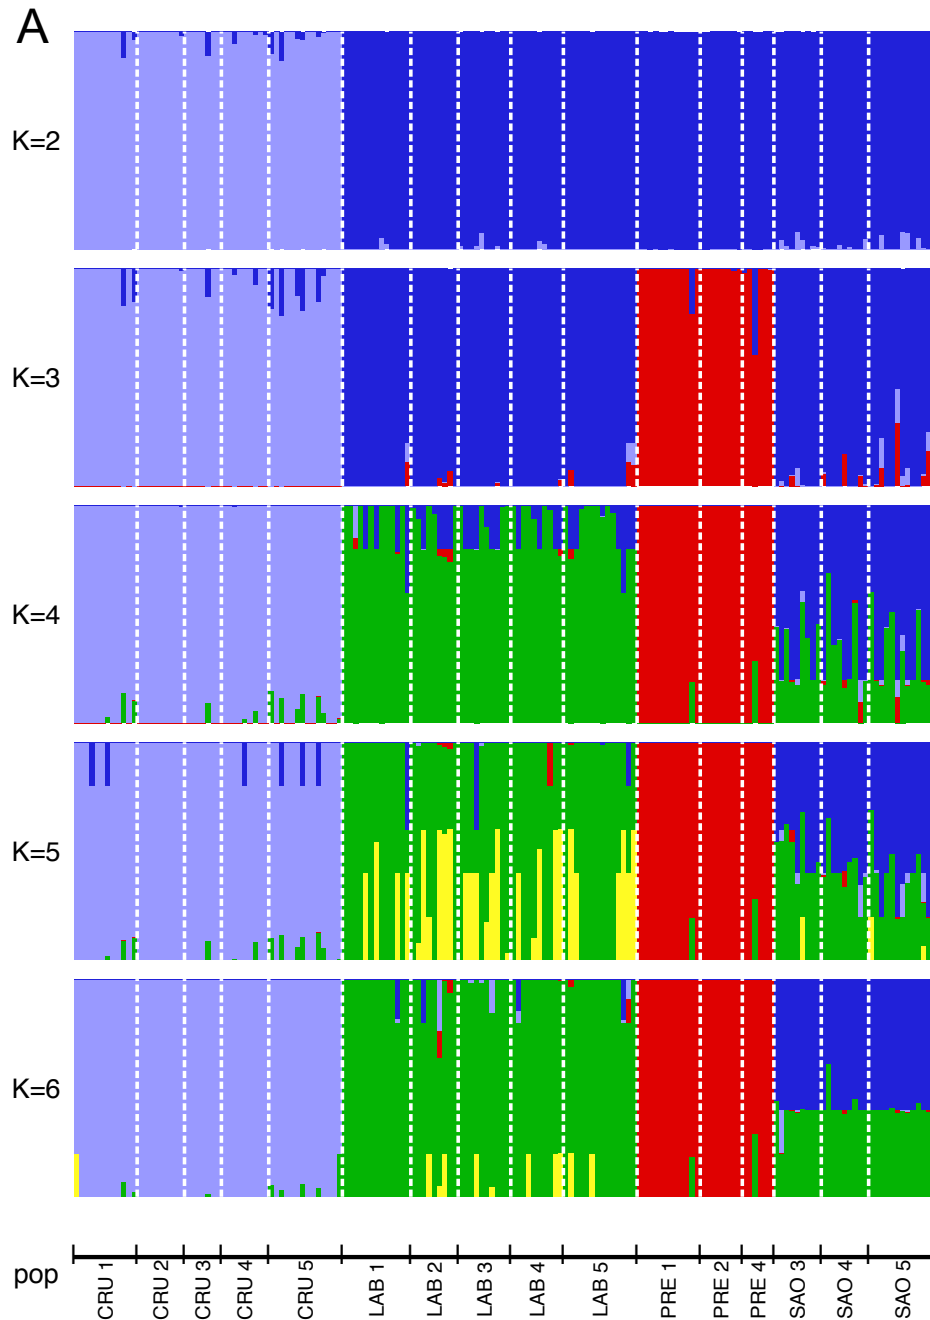

**B**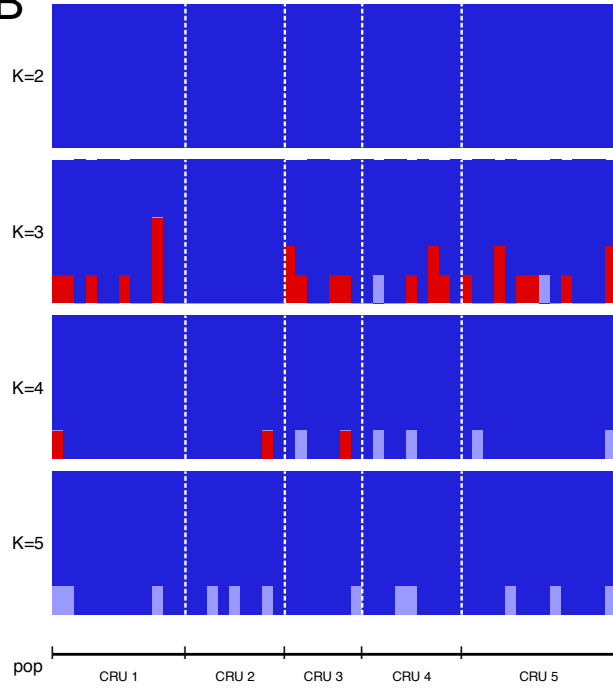**C**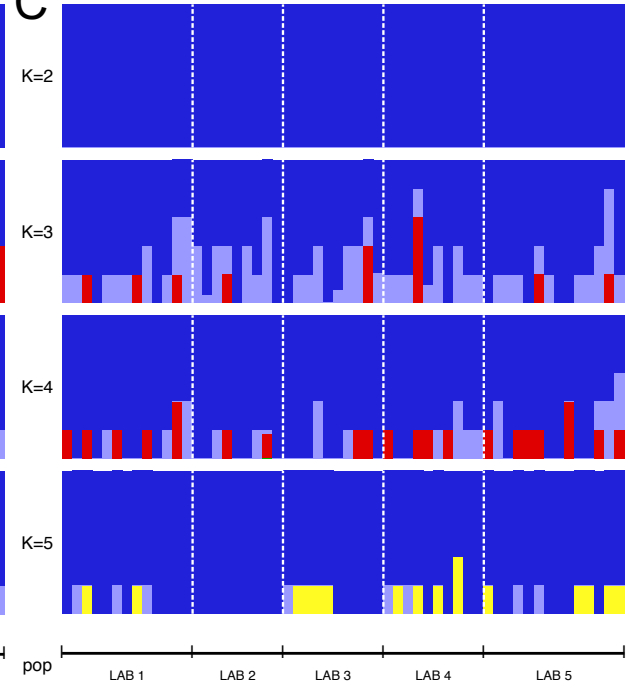**D**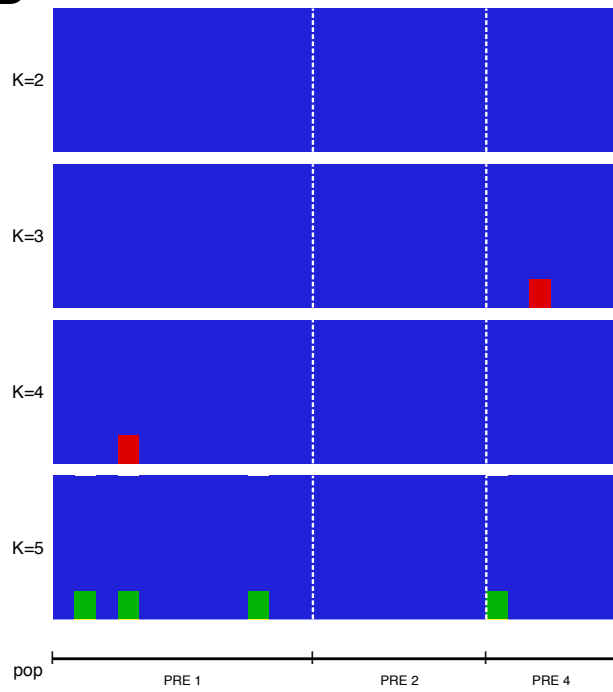**E**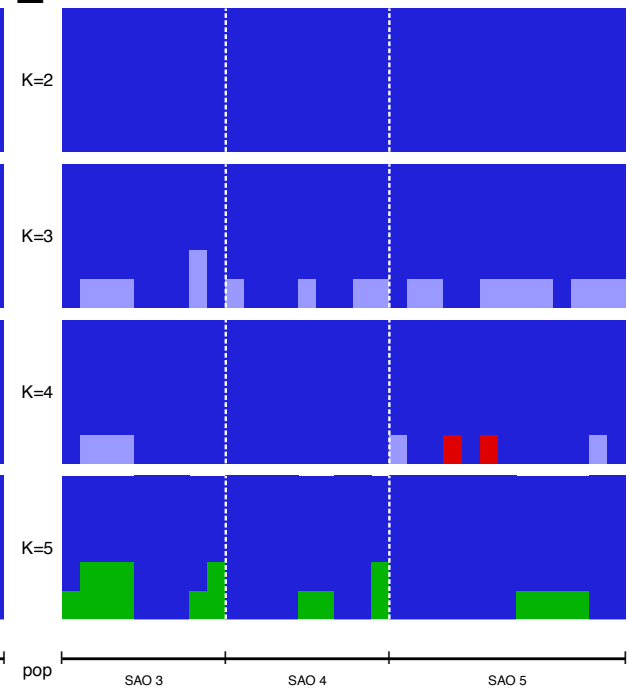

**Fig C.** Principal components analysis of 5561 SNP dataset, with shapes and colors indicating the locality and forest cover level of *Ny. darlingi* collection sites.

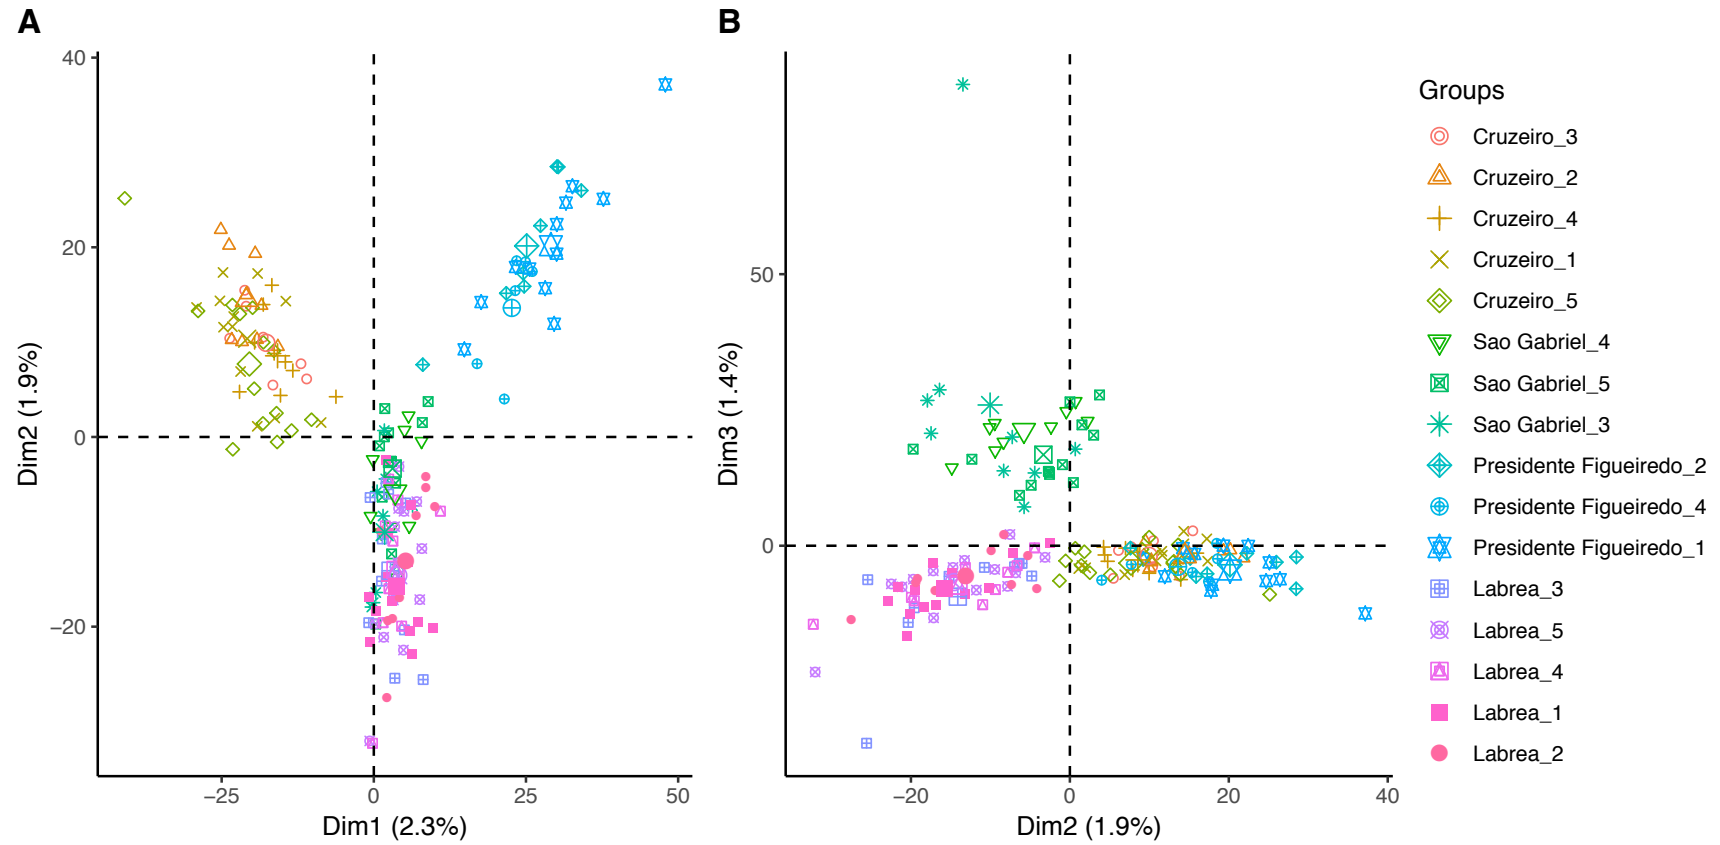

**Fig D.** Selection of optimal number of clusters for Discriminant Analysis of Principal Components (DAPC). (A) Bayesian Information Criterion (BIC) and (B) Akaike Information Criterion (AIC) for 1 to 30 clusters using K-means clustering in preparation for DAPC.

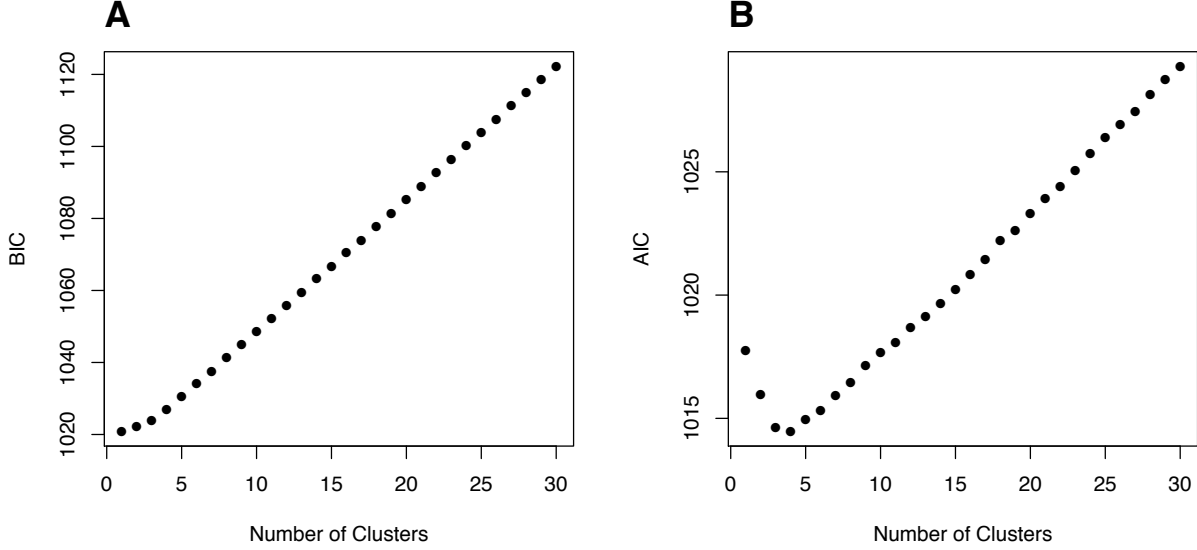

**Fig E.** Isolation by distance plot depicting Prevosti's absolute genetic distance vs. geographic distance in km for pairs of 16 collection sites. Each dot represents a pairwise comparison between two collection sites.

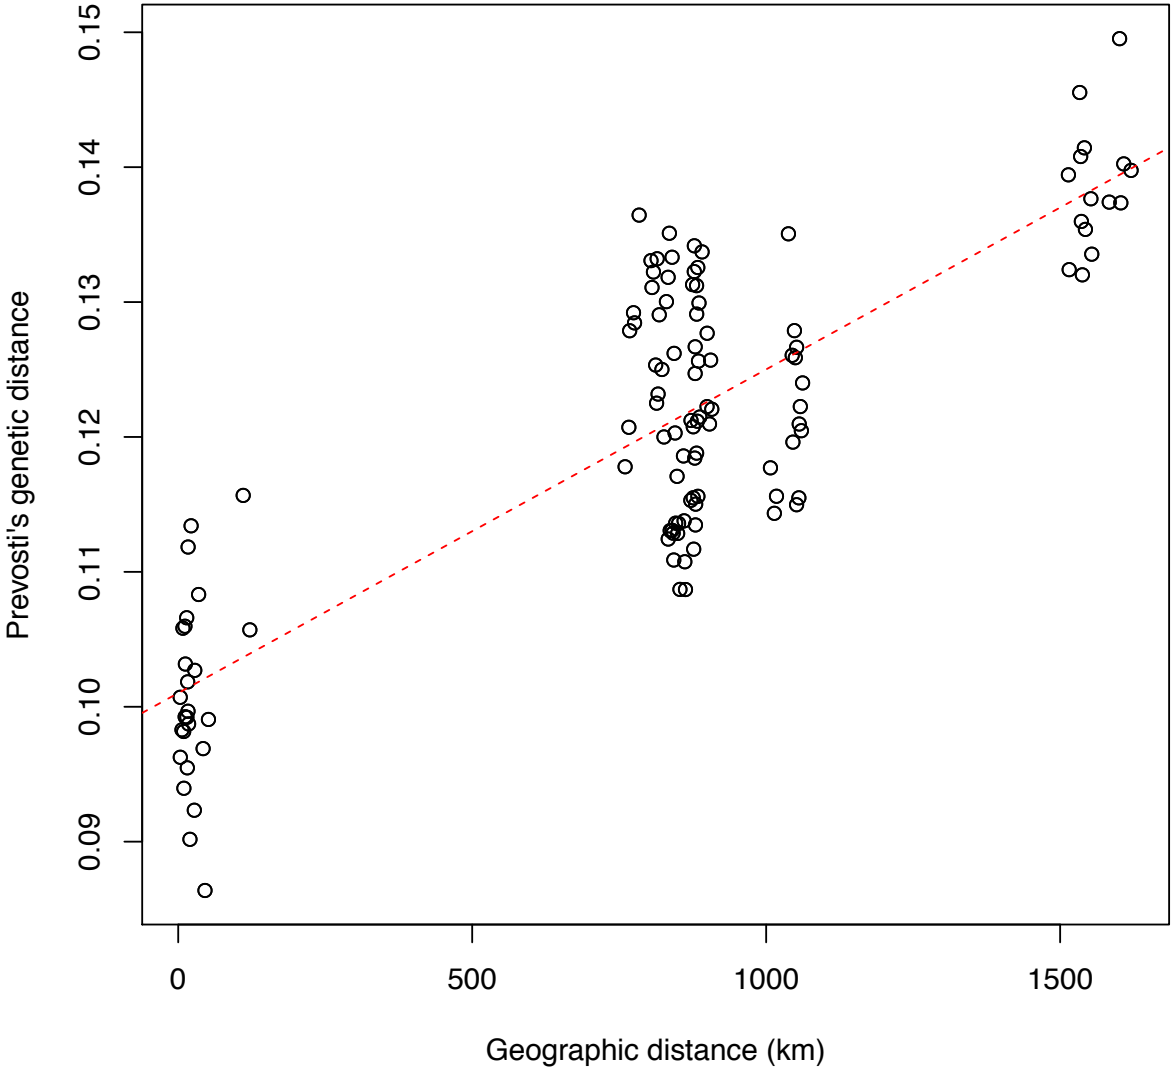

**Fig F.** Selection of candidate SNPs. (A) Plot of negative log of adjusted LFMM  $p$ -values for 5561 SNPs, highlighting SNPs with  $p < 0.05$ . (B) Plot of log of bayenv2 Bayes factors and absolute value of Spearman's  $\rho$  for 5561 SNPs, highlighting SNPs in the top 5% of Bayes factors and the top 10% of Spearman's  $\rho$ .

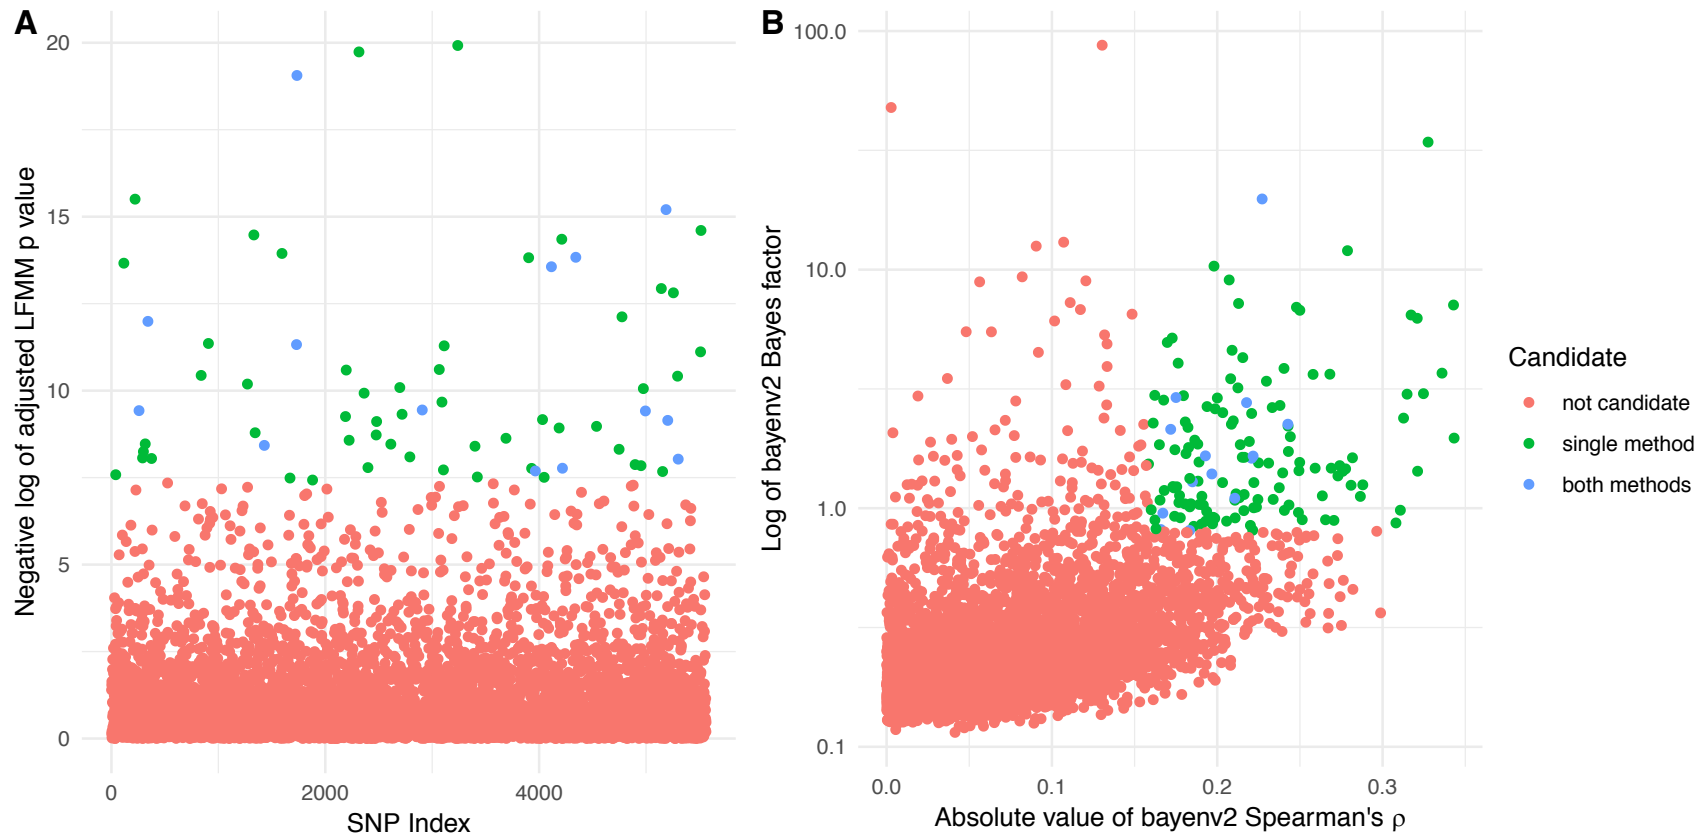



**Fig G.** Frequency of major allele for each candidate SNP within each collection site, plotted by the forest cover percentage at each site.

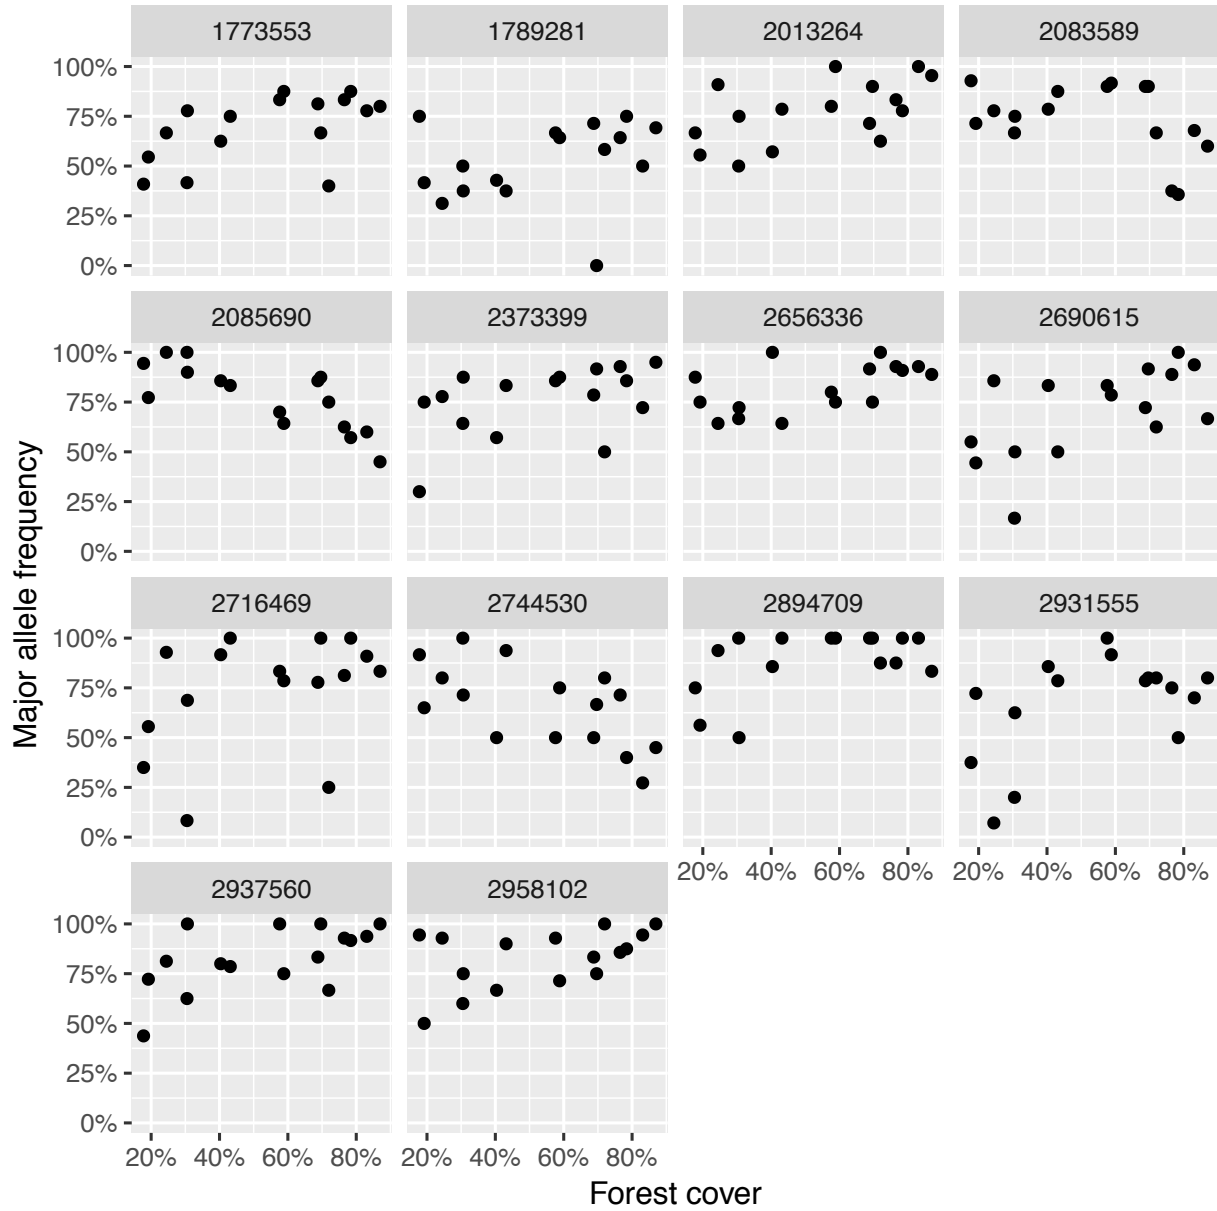

**Table A.** GO terms significantly enriched (Fisher's  $p < 0.01$ ) within 100kb of candidate SNPs in *Ny. darlingi* genome.

| <b>GO Sub-ontology</b>  | <b>GO ID</b> | <b>Description</b>                                   | <b>Number in annotated genome</b> | <b>Number within 100kb of candidate SNPs</b> | <b>Expected</b> | <b>Fisher's <math>p</math>-value</b> |
|-------------------------|--------------|------------------------------------------------------|-----------------------------------|----------------------------------------------|-----------------|--------------------------------------|
| Biological Process (BP) | GO:0035278   | miRNA mediated inhibition of translation             | 3                                 | 2                                            | 0.04            | 0.0005                               |
| Biological Process (BP) | GO:0018149   | peptide cross-linking                                | 3                                 | 2                                            | 0.04            | 0.0005                               |
| Cellular Component (CC) | GO:0005576   | extracellular region                                 | 178                               | 8                                            | 1.82            | 0.0004                               |
| Molecular Function (MF) | GO:0003810   | protein-glutamine gamma-glutamyltransferase activity | 3                                 | 2                                            | 0.04            | 0.0006                               |
| Molecular Function (MF) | GO:0052689   | carboxylic ester hydrolase activity                  | 51                                | 4                                            | 0.75            | 0.007                                |
| Molecular Function (MF) | GO:0035091   | phosphatidylinositol binding                         | 27                                | 3                                            | 0.4             | 0.007                                |
